# Supplementary material for: Lab-on-a-Film disposable for genotyping multidrug-resistant Mycobacterium tuberculosis from sputum extracts
Source: Royal Society of Chemistry journal article supplement (doi:10.1039/c8lc01404c), 2019-01-01
Supplement: c8lc01404c1.pdf [file c8lc01404c1.pdf]

Supplement Table 1. Comparison of clinical primary sputum specimens processed from Akonni's Automated TruTip Workstation and analyzed on the Lab-on-a-Film disposable with Sanger Sequencing, DST, and Smear status. WT: wild type, S: Susceptible to INH and RIF. \* First run was discordant. Repeat (shown) was concordant. † First run was indeterminate. Repeat (shown) was concordant. \*\*Contaminated with bacteria other than MTB.

| Sample ID | Lab-on-a-Film |                                     |                     | Sequencing |                           |                            | DST | Smear        | MGIT | LJ |      |
|-----------|---------------|-------------------------------------|---------------------|------------|---------------------------|----------------------------|-----|--------------|------|----|------|
|           | MTB           | rpoB                                | katG                | inhA       | rpoB                      | katG                       |     |              |      |    | inhA |
| PSR 5     | +             | WT*                                 | WT                  | WT         | WT                        | WT                         | WT  | S            | 1+   | +  | +    |
| PSR 6     | +             | WT†                                 | WT                  | WT         | WT                        | WT                         | WT  | S            | 2+   | +  | +    |
| PSR 7     | +             | WT                                  | WT                  | WT         | WT                        | WT                         | WT  | S            | 1+   | +  | +    |
| PSR 8     | +             | D516V<br>GAC -> GTC                 | S315T<br>AGC -> ACC | WT         | D516V<br>GAC -> GTC       | S315T<br>AGC -> ACC        | WT  | RIF &<br>INH | 3+   | +  | +    |
| PSR 9     | +             | WT                                  | WT                  | WT         | WT                        | WT                         | WT  | S            | 2+   | +  | +    |
| PSR 10    | +             | D516V<br>GAC -> GTC                 | S315T<br>AGC -> ACC | WT         | D516V<br>GAC -> GTC       | S315T<br>AGC -> ACC        | WT  | RIF &<br>INH | 2+   | +  | +    |
| PSR 11    | +             | WT                                  | WT                  | WT         | WT                        | WT                         | WT  | S            | 2+   | +  | **   |
| PSR 12    |               | Poor/No amplification for both runs |                     |            | No amplification observed |                            |     | S            |      | +  | -    |
| PSR 13    | +             | WT                                  | WT                  | WT         | WT                        | WT                         | WT  | S            | 3+   | +  | +    |
| PSR 14    | +             | S531L<br>TCG -> TTG                 | WT                  | WT         | S531L<br>TCG -> TTG       | WT                         | WT  | RIF          | 3+   | +  | +    |
| PSR 15    | +             | WT*                                 | S315T<br>AGC -> ACC | WT         | WT                        | S315T<br>AGC -> ACC        | WT  | INH          | 3+   | +  | +    |
| PSR 16    | +             | S531L<br>TCG -> TTG                 | WT                  | WT         | S531L<br>TCG -> TTG       | WT                         | WT  | RIF          | 3+   | +  | +    |
| PSR 17    | +             | WT                                  | S315T<br>AGC -> ACC | WT         | WT                        | S315T<br>AGC -> ACC        | WT  | INH          | 3+   | +  | +    |
| PSR 18    | +             | WT                                  | WT                  | WT         | WT                        | WT                         | WT  | S            | 2+   | +  | +    |
| PSR 19    | +             | WT                                  | WT                  | WT         | WT                        | WT                         | WT  | S            | 1+   | +  | +    |
| PSR 20    | +             | WT                                  | WT                  | WT         | WT                        | WT                         | WT  | S            | 1+   | +  | +    |
| PSR 21    | +             | D516V<br>GAC -> GTC                 | S315T<br>AGC -> ACC | WT         | D516V<br>GAC -> GTC       | S315T<br>AGC -> ACC        | WT  | RIF &<br>INH | 3+   | +  | +    |
| PSR 22    | +             | WT                                  | S315T<br>AGC -> ACC | WT         | WT                        | S315T<br>AGC -> ACC        | WT  | INH          | 3+   | +  | +    |
| PSR 23    | +             | WT                                  | WT†                 | WT†        | WT                        | WT                         | WT  | S            | 1+   | +  | +    |
| NSR 1     | +             | WT*                                 | WT                  | WT         | WT                        | WT                         | WT  | S            | -    | +  | -    |
| NSR 2     | +             | WT                                  | WT†                 | WT         | WT                        | WT                         | WT  | S            | -    | +  | +    |
| NSR 3     | +             | WT                                  | S315T<br>AGC -> ACC | WT         | WT                        | S315T<br>AGC -> ACC        | WT  | INH          | -    | +  | +    |
| NSR 4     | +             | WT                                  | S315T<br>AGC -> ACC | WT         | WT                        | WT/S315T mix<br>AGC -> ACC | WT  | INH          | -    | +  | +    |
| NSR 5     | +             | WT*                                 | S315T<br>AGC -> ACC | WT         | WT                        | WT/S315T mix<br>AGC -> ACC | WT  | INH          | -    | +  | -    |
| NSR 6     | +             | WT                                  | WT                  | WT         | WT                        | WT                         | WT  | S            | -    | +  | -    |
| NSR 7     | +             | WT                                  | WT                  | WT         | WT                        | WT                         | WT  | S            | -    | +  | -    |
| NSR 8     | +             | WT                                  | WT                  | WT         | WT                        | WT                         | WT  | S            | -    | +  | +    |
